# Supplementary material for: Efficient suppression of amyloid-β peptide aggregation and cytotoxicity with photosensitive polymer nanodots
Source: Royal Society of Chemistry journal article supplement (doi:10.1039/d0tb00302f), 2020-01-01
Supplement: d0tb00302f1.pdf [file d0tb00302f1.pdf]

*Supporting Information*

**Efficient Suppression of Amyloid- $\beta$  Peptide Aggregation and  
Cytotoxicity with Photosensitive Polymer Nanodots**

Yueling Xu,<sup>†</sup> and Lehui Xiao<sup>\*,†</sup>

<sup>†</sup> State Key Laboratory of Medicinal Chemical Biology, Tianjin Key Laboratory of Biosensing and  
Molecular Recognition, College of Chemistry, Nankai University, Tianjin, 300071, China

\* Corresponding author: lehuixiao@nankai.edu.cn

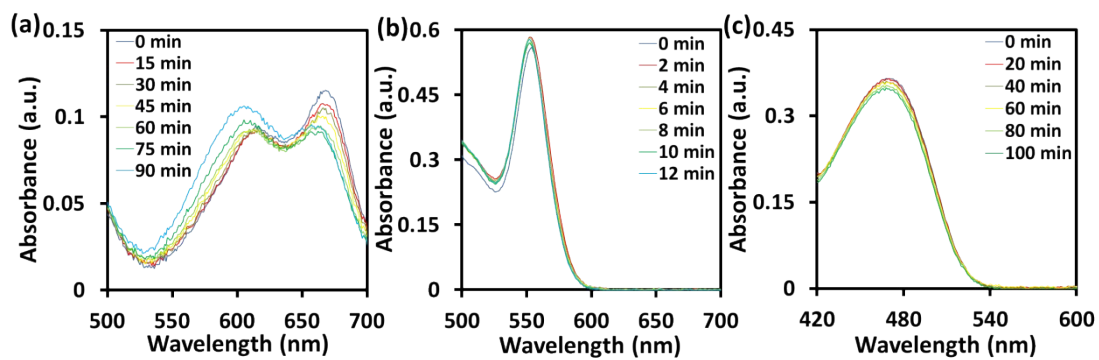

**Fig. S1** The absorbance spectra of (a) MB-Pdots, (b) RB-Pdots, and (c) RF-Pdots under different irradiation time.

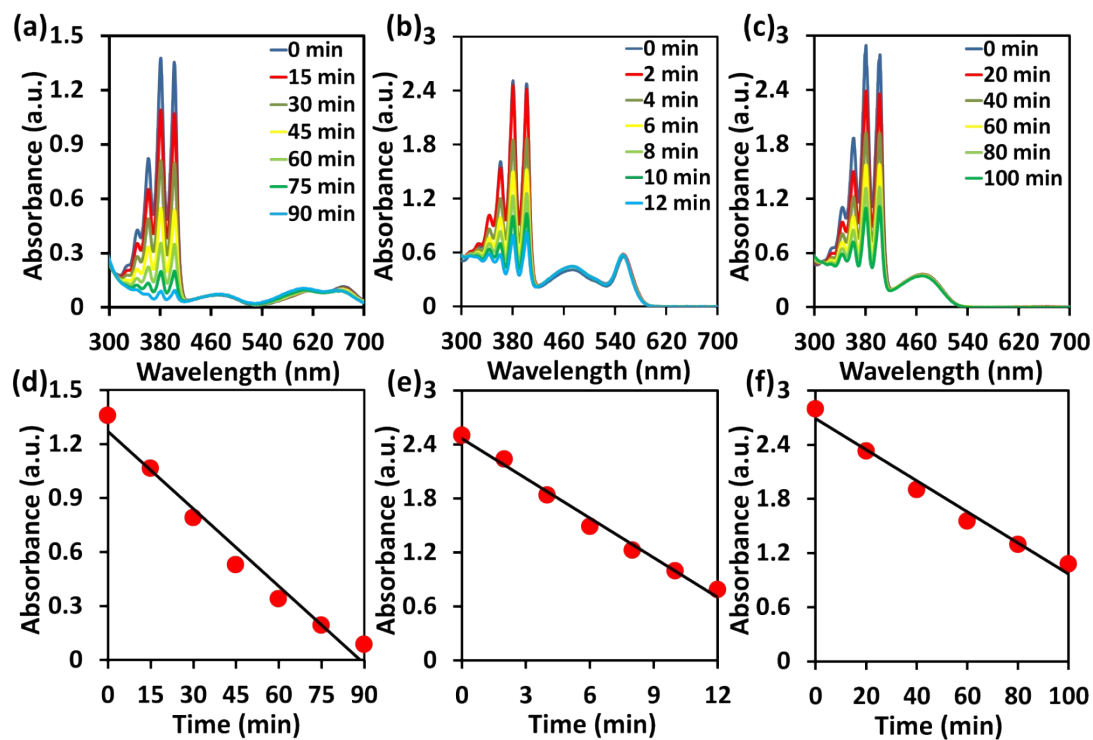

**Fig. S2** (a-c) Absorbance intensity of ABDA with different irradiation time in the presence of MB-, RB-, and RF-Pdots respectively. (d-f) Absorbance intensity of ABDA at 380 nm for the MB-, RB-, and RF-Pdots as a function of the irradiation time.

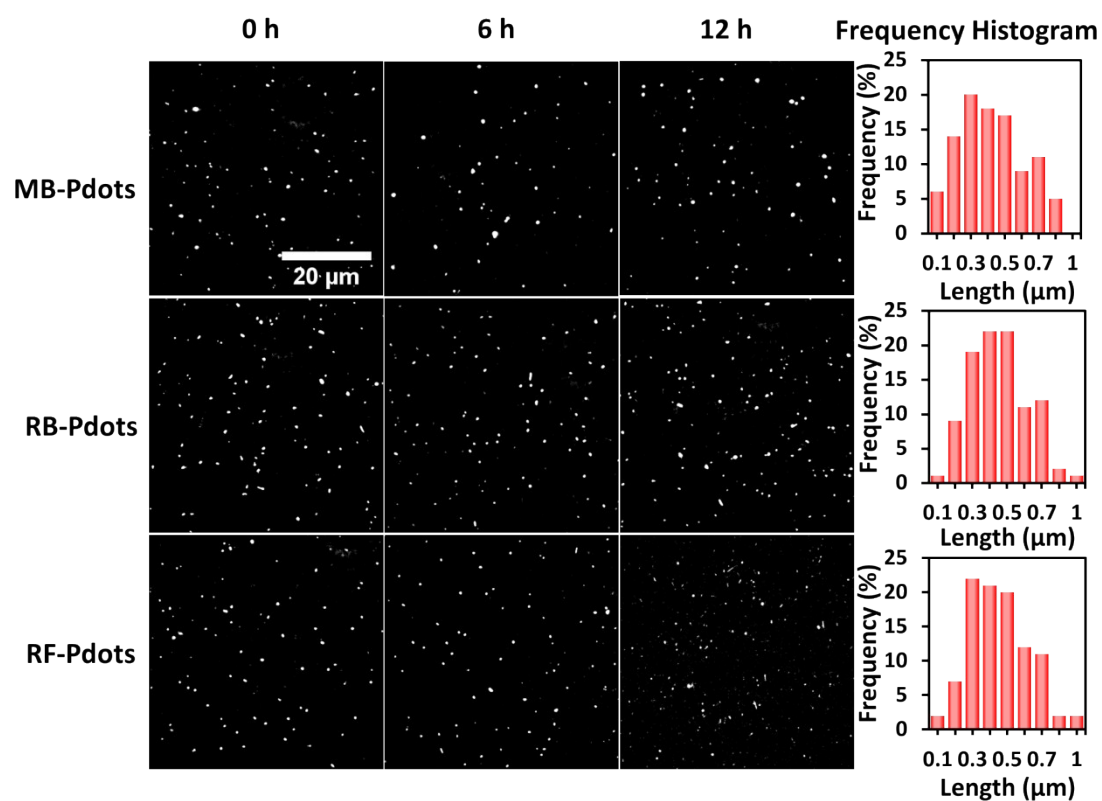

**Fig. S3** Fluorescence microscopic images and the length distributions (right row) of  $A\beta_{1-40}$  growth solution at different incubation time (0, 6 and 12 h) after adding MB-Pdots (30  $\mu\text{g/mL}$ ), RB-Pdots (30  $\mu\text{g/mL}$ ) and RF-Pdots (30  $\mu\text{g/mL}$ ).

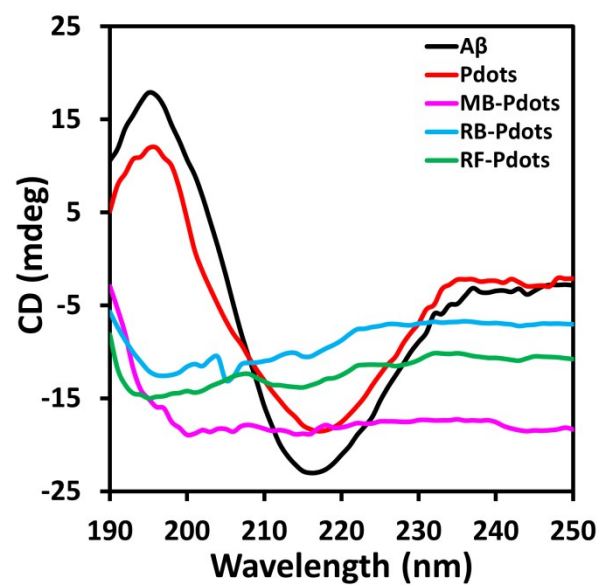

**Fig. S4** The CD spectra of  $A\beta_{1-40}$  growth solution (black), the mixture of  $A\beta_{1-40}$  growth solution with Pdots (red), MB-Pdots (purple), RB-Pdots (blue) and RF-Pdots (green) at 24 h.

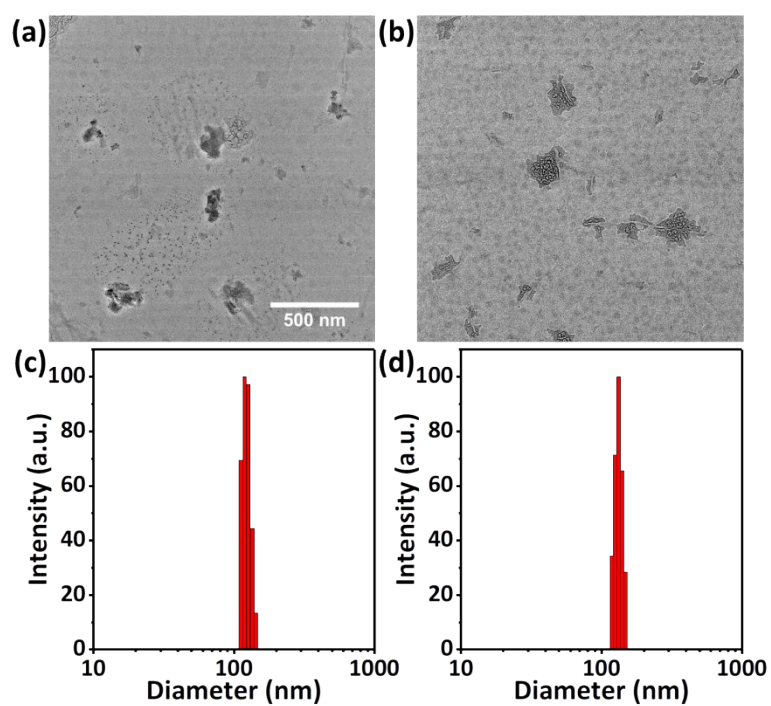

**Fig. S5** TEM image of  $A\beta_{1-40}$  treated with MB-Pdots (a) and RF-Pdots (b) under irradiation and followed by incubation for 24 h at 37 °C, respectively. DLS size distribution of  $A\beta_{1-40}$  treated with MB-Pdots (c) and RF-Pdots (d) under irradiation and followed by incubation for 24 h at 37 °C, respectively.

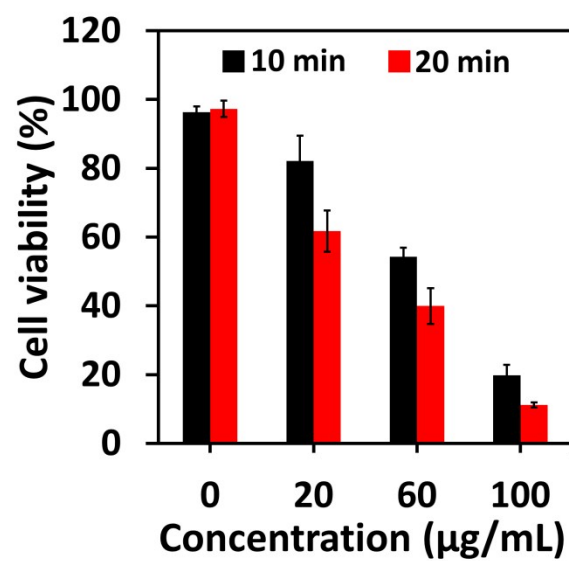

**Fig. S6** The cellular cytotoxicity analysis. PC12 cells were incubated with variable concentrations of RB-Pdots under different irradiation time.

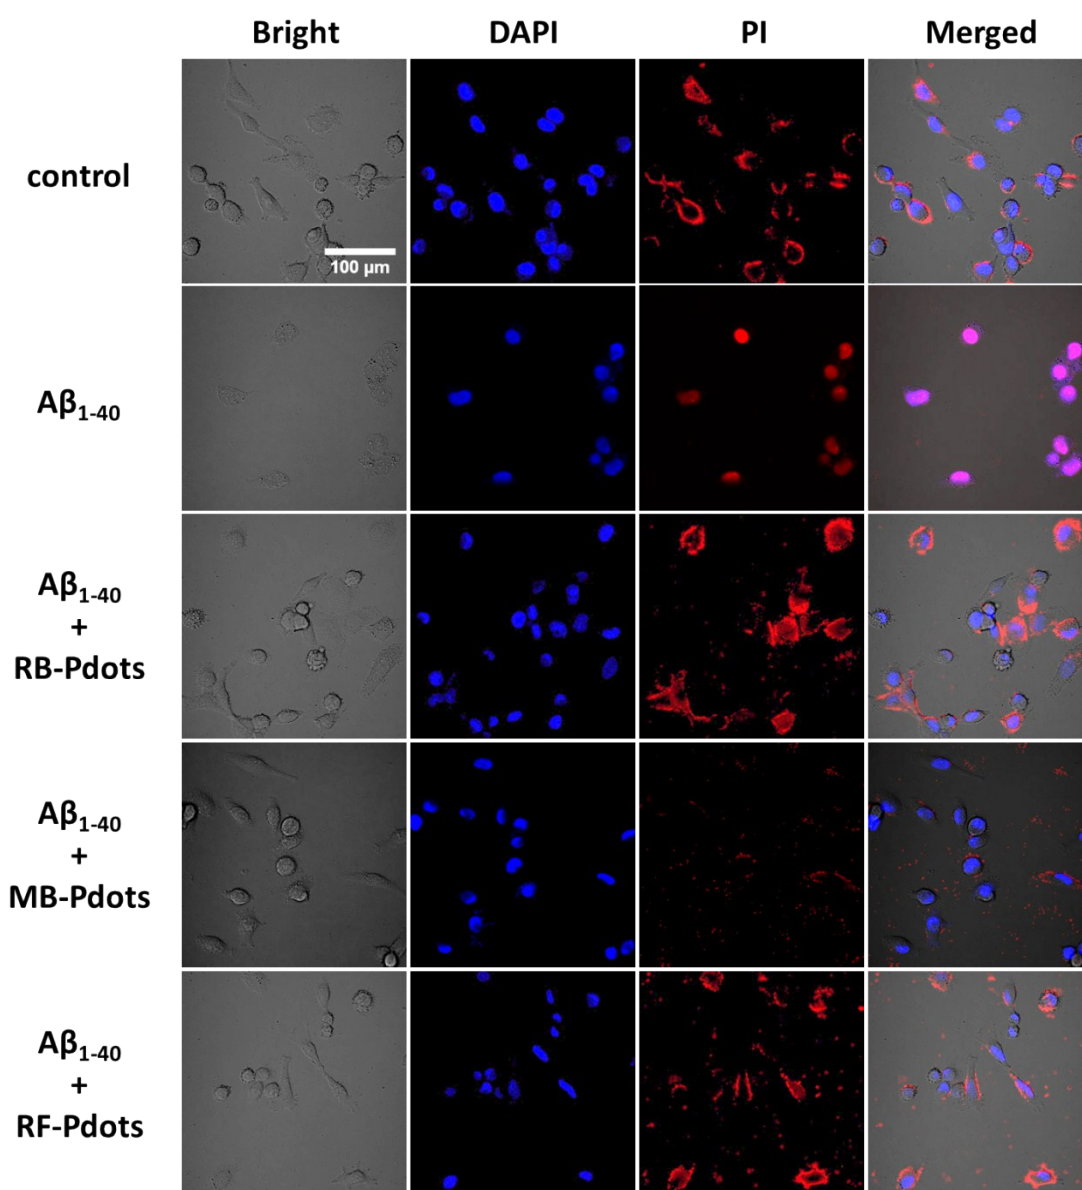

**Fig. S7** Confocal microscopic characterizations of the cytotoxicity effect of  $A\beta_{1-40}$  aggregates, the mixture of  $A\beta_{1-40}$  monomers and functional Pdots toward PC12 cells.
